# 1 Metagenomic analysis of ecological niche overlap and 2 community collapse in microbiome dynamics

3  
4 Hiroaki Fujita<sup>1\*</sup>, Masayuki Ushio<sup>1,2</sup>, Kenta Suzuki<sup>3</sup>, Masato S. Abe<sup>4</sup>, Masato Yamamichi<sup>5,6</sup>,  
5 Yusuke Okazaki<sup>7</sup>, Alberto Canarini<sup>1</sup>, Ibuki Hayashi<sup>1</sup>, Keitaro Fukushima<sup>8</sup>, Shinji Fukuda<sup>9-12</sup>,  
6 E. Toby Kiers<sup>13</sup>, and Hirokazu Toju<sup>1\*</sup>

7  
8 <sup>1</sup>Center for Ecological Research, Kyoto University, Otsu, Shiga 520-2133, Japan

9 <sup>2</sup>Department of Ocean Science (OCES), The Hong Kong University of Science and  
10 Technology (HKUST), Clear Water Bay, Kowloon, Hong Kong SAR, China

11 <sup>3</sup>Integrated Bioresource Information Division, BioResource Research Center, RIKEN,  
12 Tsukuba, Ibaraki 305-0074, Japan

13 <sup>4</sup>Faculty of Culture and Information Science, Doshisha University, Kyotanabe, Kyoto 610-  
14 0321, Japan

15 <sup>5</sup>School of Biological Sciences, The University of Queensland, St. Lucia, Brisbane, QLD  
16 4072, Australia

17 <sup>6</sup>Department of International Health and Medical Anthropology, Institute of Tropical  
18 Medicine, Nagasaki University, Nagasaki 852-8523, Japan

19 <sup>7</sup>Institute for Chemical Research, Kyoto University, Gokasho, Uji, Kyoto 611-0011, Japan

20 <sup>8</sup>Faculty of Food and Agricultural Sciences, Fukushima University, Kanayagawa 1,  
21 Fukushima, Fukushima 960-1296, Japan.

22 <sup>9</sup>Institute for Advanced Biosciences, Keio University, Tsuruoka, Yamagata 997-0052, Japan.

23 <sup>10</sup>Gut Environmental Design Group, Kanagawa Institute of Industrial Science and  
24 Technology, Kawasaki, Kanagawa 210-0821, Japan.

25 <sup>11</sup>Transborder Medical Research Center, University of Tsukuba, Tsukuba, Ibaraki 305-8575,

26 Japan.

27 <sup>12</sup>Laboratory for Regenerative Microbiology, Juntendo University Graduate School of  
28 Medicine, Tokyo 113-8421, Japan.

29 <sup>13</sup>Department of Ecological Science, Vrije Universiteit Amsterdam, Amsterdam, the  
30 Netherlands

31

32 Correspondence and requests for materials should be addressed to H.F. (email:  
33 [fujita.h@ecology.kyoto-u.ac.jp](mailto:fujita.h@ecology.kyoto-u.ac.jp)) or H.T. (email: [toju.hirokazu.4c@kyoto-u.ac.jp](mailto:toju.hirokazu.4c@kyoto-u.ac.jp)).

34

35

36 **Abstract**

37 Species utilizing the same resources ultimately do not coexist for long periods of time. Such  
38 competitive exclusion mechanisms potentially underly dynamics of microbiomes, causing  
39 breakdowns of communities constituted by species with similar genetic backgrounds of  
40 resource use. Nonetheless, it remains a major challenge to integrate genomics and ecology for  
41 understanding deterministic processes of species coexistence in species-rich communities. We  
42 here show that community-scale analyses of functional gene redundancy provide statistical  
43 platforms for interpreting and predicting collapse of bacterial communities. Through 110-day  
44 time-series of experimental microbiome dynamics, we analyzed the metagenome-assembled  
45 genomes of coexisting bacterial species. We then reconstructed ecological niche space based  
46 on the multivariate analysis of the genome compositions in order to evaluate potential shifts  
47 in the level of niche overlap between species through time. Specifically, we hypothesized that  
48 community-scale pressure of competitive exclusion could be evaluated by quantifying overlap  
49 of genetically determined resource-use profiles (metabolic pathway profiles) among  
50 coexisting species. We found that the degree of community compositional changes observed  
51 in the experimental microbiome was explained by the magnitude of metabolic pathway (gene  
52 repertoire) overlaps among bacterial species. The metagenome-based analysis of genetic  
53 potential for competitive exclusion will help us forecast major events in microbiome  
54 dynamics such as sudden community collapse (i.e., dysbiosis).

55

56 Classic niche theory predicts that coexistence of species requires interspecific difference in  
57 resource ranges<sup>1-6</sup>. Although some specific mechanisms can guarantee coexistence even in the  
58 presence of niche overlap (e.g., spatial structure of habitats and temporal variability in  
59 resource availability), similarity/dissimilarity in basic resource dependency among species is  
60 the key factor determining the occurrence of competitive exclusion<sup>7-9</sup>. Therefore, evaluating  
61 the overlap of “fundamental niches”, which are defined by species’ fundamental resource  
62 requirements and resource-use capabilities<sup>10,11</sup>, is an essential step for understanding and  
63 predicting community-level dynamics.

64 Insights into fundamental niches are encrypted in species’ genomes<sup>12-14</sup>. In other words,  
65 as species’ traits are encoded in their DNA, reconstructed genomes provide the ultimate basis  
66 for evaluating target species’ fundamental niches<sup>15,16</sup>. Thus, potential strength of competitive

67 interactions within ecological guilds or communities could be evaluated based on the  
68 distribution of species' gene repertoires within ecological niche space reconstructed with  
69 metagenomic data<sup>12,15,16</sup> ("metagenomic niche space"). Although overlap of niches does not  
70 always cause competitive exclusion<sup>7-9</sup>, higher levels of gene repertoire overlap within a  
71 community may impose greater impacts on population dynamics of constituent species.

72 It is essential to examine whether such competition-driven population-level  
73 phenomena underly drastic ecological events observed at the community level. Microbial  
74 communities sometimes show sudden and substantial changes in species and/or taxonomic  
75 compositions<sup>17-19</sup>. Human gut microbiomes, for example, have been reported to show drastic  
76 shifts from species-rich states to "imbalanced" states with low  $\alpha$ -diversity and  
77 overrepresentation of pathogenic species<sup>20-23</sup> (e.g., *Clostridium difficile*). Elucidating the  
78 ecological mechanisms by which such drastic community-level events are caused provide  
79 fundamental insights into microbiome dynamics<sup>23-25</sup>. In this respect, an important challenge is  
80 to test the hypothesis that higher levels of gene-repertoire overlap are observable prior to  
81 drastic community compositional changes than after such changes. However, this hypothesis,  
82 to our knowledge, has not yet been tested presumably due to the paucity of time-series  
83 observations of microbiomes with substantial compositional changes. Even if such  
84 microbiome time-series data are available, analyses of potential niche (gene repertoire)  
85 overlap require another line of information, specifically, data of respective species' genomes  
86 at multiple time points. Therefore, developing research systems that overcome these current  
87 constraints is expected to deepen our understanding of microbiome ecological processes.

88 We here show how degree of gene-repertoire overlap changes through dynamics of  
89 species-rich microbial communities. By targeting an experimental microbial system showing  
90 rapid and substantial changes in taxonomic compositions<sup>19</sup>, we reconstruct niche space  
91 depicting species' gene repertoires. Based on a whole-genome shotgun metagenomic analysis  
92 at 13 time points within the 110-day time-series of the microbiome experiment, we reveal  
93 temporal shifts in the magnitude of gene repertoire overlap among microbial species. We then  
94 examine whether a high level of fundamental-niche overlap is observed prior to drastic  
95 changes in community structure. Overall, we explore how signs of drastic shifts in community  
96 structure are detected by reconstructing community-scale degree of fundamental niche  
97 overlap with the aid of genomic information.

98

## 99 Results

100 **Target microbiome.** We focused on the experimental microbiome showing drastic shifts in  
101 taxonomic compositions<sup>19</sup>. In a previous study<sup>19</sup>, a 110-day monitoring of microbiomes was  
102 performed with six experimental settings. To set up experimental microbiomes with high  
103 diversity of bacterial species/taxa, natural microbial communities derived from soil or pond-  
104 water ecosystems, rather than “synthetic” communities with pre-defined diversity, were used  
105 as source inocula. Specifically, microbiomes were set up with combinations of two source  
106 inoculum types (soil- or pond-water-derived inoculum microbiomes) and three medium types  
107 (oatmeal, oatmeal-peptone, or peptone broth medium) with eight replications ( $2 \times 3 \times 8 = 48$   
108 microbiomes; see Methods for details). From each of the 48 microbiomes, a fraction of each  
109 replicate community was sampled every 24 hours. The collected samples were subjected to  
110 the amplicon sequencing of the 16S rRNA region and the temporal changes in community  
111 compositions were monitored throughout the time-series<sup>19</sup>. By calculating the magnitude of  
112 time-series changes in community compositions<sup>19</sup> (“abruptness” index; Fig. 1a;  
113 Supplementary Fig. 1), we focused on a water-inoculum/oatmeal-medium replicate  
114 community showing the most abrupt (rapid and substantial) changes in community  
115 compositions among the 48 microbiomes examined (Fig. 1a; Supplementary Fig. 1).

116  
117 **Functional dynamics of microbiomes.** By targeting the replicate community mentioned  
118 above, we performed whole-genome shotgun sequencing at 13 time points across the time-  
119 series. In total, 32 high-quality (> 80 % completeness and < 5 % contamination) metagenome-  
120 assembled genomes (MAGs) belonging to 20 genera (16 families; 12 orders) were detected  
121 (Figs. 1b-c and 2; Supplementary Fig. 2; Supplementary Table 1). As indicated in the  
122 amplicon sequencing analysis<sup>19</sup> (Fig. 1a), drastic shifts from taxon-rich community states to  
123 oligopolistic states was observed around Day 20 in the shotgun sequencing analysis (Fig. 1b).

124 After the drastic community compositional change, the system reached a quasi-stable  
125 state represented by the dominance of a *Hydrotalea* (Chitinophagaceae) bacterium (Fig. 1b).  
126 The MAG of the *Hydrotalea* was characterized by relatively low GC content (38 %) and  
127 relatively small genome size within the community (ca. 3.1 Mb; Fig. 2a). In contrast, the two  
128 bacterial MAGs consistently coexisted with the dominant *Hydrotalea* through the time-series  
129 (i.e., *Terracidiphilus* and *Mangrovibacter*) had larger genome size (4.2 and 5.4 Mb,  
130 respectively; Fig. 1c), characterized by various genes absent from the *Hydrotalea* genome  
131 (Fig. 2; Supplementary Fig. 3). Specifically, the *Terracidiphilus* MAG showed metabolic

132 pathways/processes for degrading plant-derived biopolymers (e.g., cellulose; Fig. 2),  
133 potentially surviving as a primary user of polymer compounds within the plant-derived  
134 (oatmeal) medium. Meanwhile, the *Mangrovibacter* MAG had pathways/processes related to  
135 starch degradation (e.g., amylase) and vitamin-B<sub>12</sub> transportation, which were absent from the  
136 genomes of *Hydrotalea*, *Terracidiphilus*, and the other MAG (*Rhizomicrobium*) detected on  
137 Day 40-60 (Fig. 2).

138

139 **Multivariate analysis of gene repertoires.** The whole-genome shotgun metagenomic data  
140 were used to evaluate how the level of gene repertoire overlap among microbes shifted  
141 through time. We anticipated that microbial species with similar resource-use abilities or  
142 restrictions have similar genomic structure. Therefore, it is expected that species competing  
143 for the same resource tend to form clusters within the space defined based on the principal  
144 coordinate analysis (PCoA) of dissimilarity in gene repertoires. For each pair of the 32  
145 MAGs, dissimilarity (Jaccard  $\beta$ -diversity) of gene repertoires was calculated based on the  
146 matrix representing the presence/absence of the 6,999 genes annotated with the program  
147 Prokka<sup>26</sup>. A PCoA was then performed using the  $\beta$ -diversity information (Fig. 3a). At each of  
148 the 13 time point, detected MAGs were plotted on the PCoA space. Since we did not have *a*  
149 *priori* knowledge of specific metabolic pathways keys to the microbe-to-microbe competition  
150 within the experimental microbiome, the entire datasets were used in this multivariate  
151 analysis. Given general characteristics of multivariate analysis based on  $\beta$ -diversity metrics,  
152 the multivariate reconstruction of ecological niche space depends greatly on the genes whose  
153 presence/absence profiles vary among species, while housekeeping genes possessed by most  
154 species are expected to contribute little to the multivariate analysis.

155 We then found that alphaproteobacterial and gammaproteobacterial MAGs respectively  
156 constituted some clusters within the niche space reconstructed based on the multivariate  
157 analysis early in the microbiome dynamics (Day 1-20; Fig. 3b). This state with high niche  
158 overlap and potential within-guild competition for resources then collapsed into a simpler  
159 community state represented by *Hydrotalea*, *Mangrovibacter*, *Terracidiphilus*, and  
160 *Rhizomicrobium* as detailed above (Fig. 3b). The space once occupied by many  
161 alphaproteobacterial and gammaproteobacterial MAGs remained unoccupied or sparsely  
162 occupied after the community compositional collapse. Even when the number of MAGs  
163 detectable with our shotgun-metagenomic sequencing increased again late in the time-series,  
164 aggregations of microbes with similar genomic compositions remained unobserved (Fig. 3b).

165

166 **Metagenomic niche overlap.** We next quantitatively evaluated dynamics in the magnitude of  
167 community-scale niche overlap within the multivariate space (Fig. 3). In our analysis, the  
168 niche overlap index was defined as:

169 
$$1 - \frac{\sum_{i \in D, j \in D} \beta_{ij}}{N_D},$$

170 where  $D$  is the set of MAGs detected on a focal day (time point),  $\beta_{ij}$  is the Jaccard metric of  
171 dissimilarity in gene compositions, and  $N_D$  is the number of MAGs detected on the day. By  
172 definition, this niche overlap value varies from 0 (completely different repertoires of genes in  
173 all pairs of MAGs) and 1 (completely identical gene repertoires in all pairs of MAGs),  
174 allowing us to evaluate niche overlap levels of target communities within the standardized  
175 ranges. The results indicated that the level of niche overlap was the highest on Day 1 and that  
176 it gradually decreased until Day 20 (Fig. 4a-b). A slight increase in the niche overlap index  
177 was observed on Day 24, but it dropped sharply by Day 30 (Fig. 4a-b). Although the niche  
178 overlap score remained low between Day 40 and 60, it increased again on Day 70 (Fig. 4b).

179 We then found that the estimated niche overlap level significantly explained the  
180 magnitude of the observed community compositional changes ( $t = 5.525$ ,  $df = 10$ ,  $P =$   
181  $0.00025$ ; Fig. 5). In other words, higher levels of gene-repertoire overlap within a community  
182 were followed by larger shifts in community compositions at subsequent time points.

183

## 184 **Discussion**

185 We here showed that among-species overlap of gene repertoires are observable prior to drastic  
186 changes in community structure. Early in the experimental microbiome dynamics,  
187 alphaproteobacterial and gammaproteobacterial species were present, resulting in relatively  
188 high niche-overlap scores at the community level (Figs. 3 and 4). The quasi-equilibrium state  
189 then collapsed into another quasi-equilibrium represented by a small number of bacteria  
190 varying in genome size and metabolic capabilities. Throughout the time-series, higher niche  
191 overlap levels entailed greater changes in microbial community compositions (Fig. 5). These  
192 findings lead to the working hypothesis that collapse of microbiome structure is predicted by  
193 the level of potential niche overlap within multivariate metagenomic space. In light of the  
194 “limiting similarity” rule of ecological niches<sup>27</sup>, pairs of microbial species that exceed a

195 critical limit of genome compositional similarity are expected to compete for the same  
196 resources, eventually driving competitive exclusion processes. Thus, as examined in this  
197 study, similarity/dissimilarity in genetically determined resource-use properties (i.e.,  
198 fundamental niches) sets baselines for consequences of interspecific interactions.

199 The results also indicated that niche overlap level does not necessarily show monotonic  
200 decrease through microbial community processes. Although gene-repertoire overlap level and  
201 detectable species richness sharply declined early in the microbiome dynamics, both variables  
202 gradually increased again around Day 80 (Figs. 1a and 4b). In the resurgence process,  
203 however, the dense clusters of alphaproteobacterial or gammaproteobacterial species detected  
204 until Day 20 did not appear again within the niche space (Fig. 3b). These observations suggest  
205 that once collapsed, microbial communities may not return to previous states with highest  
206 levels of niche overlap, but refilling of poorly-used niches can occur under the constraint of  
207 limiting similarity within niche space.

208 The simple framework for evaluating overlap of fundamental niches is applicable to  
209 diverse types of microbiomes. Given that our  $\beta$ -diversity-based index is standardized within  
210 the range from 0 to 1, next crucial step is to examine how threshold niche overlap values for  
211 anticipating microbial community collapse vary among different types of ecosystems. Such  
212 threshold values can vary among ecosystems depending on their basic levels of sustainable  
213 functional redundancy. In our laboratory microbiome, for example, the lack of environmental  
214 fluctuations (e.g., temperature fluctuations) and spatial structure (e.g., refuges for inferior  
215 species) might severely limited coexistence of functionally similar species (species with  
216 similar metabolic capabilities). In contrast, in human gut microbiomes, spatially  
217 complexity<sup>28,29</sup> and fluctuating environmental conditions<sup>21</sup> may reduce the risk of competitive  
218 exclusion, allowing higher levels of niche overlap within communities. Thus, extension of  
219 time-series metagenomic analyses to diverse types of ecosystems<sup>30-33</sup> will enhance our  
220 knowledge of relationship among ecosystem properties, functional redundancy, and  
221 community stability.

222 In this study, we included whole metagenomic datasets of the examined microbes due to  
223 the lack of *a priori* insights into the metabolic pathways/processes playing essential roles in  
224 interspecific competition for resources. In this respect, our analysis is a preliminary  
225 conceptual step for evaluating potential overlap of fundamental niches at the community  
226 level. In future studies, analyses excluding housekeeping genes<sup>34,35</sup> or those focusing on  
227 specific functional groups of genes (e.g., carbohydrate degrading genes<sup>36</sup>) may provide more



228 reliable inference of niche overlap. Because such selection of genes can critically influence  
229 threshold niche-overlap values for anticipating abrupt community compositional changes,  
230 setting a commonly applicable criterion of choosing target gene sets will help us perform  
231 comparative analyses across a wide range of microbial communities.

232 While genomic information provides an ultimate platform for inferring fundamental  
233 niches<sup>12-14</sup>, overlap of gene repertoires may not always result in competitive exclusion of  
234 species within communities. Even in a pair of species with similar gene repertoires,  
235 differentiation in gene expression patterns may occur to avoid overlap of resource-use  
236 patterns between species, allowing coexistence of the two species in an environment. Such  
237 differentiation of “realized niches<sup>10</sup>” through phenotypic plasticity is potentially evaluated by  
238 transcriptomic or metabolomic analyses<sup>37,38</sup>. Consequently, integration of (meta)transcriptome  
239 and (meta)metabolome analyses<sup>39-41</sup> with metagenome-based analyses will reorganize our  
240 understanding of deterministic processes in microbiome dynamics.

241

242

## 243 **Methods**

244 **Time-series data of experimental microbiomes.** We used the experimental system of the  
245 microbiome time-series monitoring described in a previous study<sup>19</sup>. In the experiment,  
246 microbiomes differing in the magnitude of community compositional shifts were constructed  
247 across the six treatments defined by the combinations of two inoculum sources and three  
248 types of media. One of the source microbiomes derived from the soil collected from the A  
249 layer (0-10 cm in depth) in the research forest of Center for Ecological Research, Kyoto  
250 University, Kyoto, Japan (34.972 °N; 135.958 °E). The other source inoculum was prepared  
251 by collecting water from a pond (“Shoubuike”) near Center for Ecological Research (34.974  
252 °N, 135.966 °E). Each of the source inocula was introduced into oatmeal (Medium-A),  
253 oatmeal-peptone (Medium-B), or peptone (Medium-C) broth media with eight replicates.  
254 Thus, in total, 48 experimental microcosms (two source microbiomes × three media × eight  
255 replicates) were constructed in a deep-well plate (1000-μL-scale culture in each well). The  
256 plate was kept shaken at 1,000 rpm at 23 °C. After five-day pre-incubation, 200 μL out of the  
257 1,000-μL culture medium was sampled from each well every 24 hours for 110 days. In each  
258 sampling event, 200 μL of fresh medium was added to each well so that the total culture  
259 volume was kept constant. In total, 5,280 samples (48 communities/day × 110 days) were  
260 collected through the time-series experiment. After DNA extraction, the samples were  
261 subjected to the amplicon sequencing analysis of the 16S rRNA region<sup>19</sup>. To quantify the  
262 speed and magnitude of community shifts through time, the “abruptness” index was  
263 calculated through the time-series of each replicate microcosm in each experimental  
264 treatment<sup>19</sup>. Specifically, an estimate of the abruptness index for time point  $t$  was obtained as  
265 the Bray-Curtis  $\beta$ -diversity between average community compositions from time points  $t - 4$   
266 to  $t$  and those from  $t + 1$  to  $t + 5$  (i.e., dissimilarity between 5-day time-windows). The Bray-  
267 Curtis  $\beta$ -diversity<sup>42</sup> was calculated as  $\frac{\sum_{i=1}^n |X_{ij} - X_{ik}|}{\sum_{i=1}^n (X_{ij} + X_{ik})}$ , where  $X_{ij}$  and  $X_{ik}$  denoted relative  
268 abundance of microbial amplicon sequence variant (ASV)  $i$  in the compared time windows ( $j$ ,  
269 from  $t - 4$  to  $t$ ;  $k$ , from  $t + 1$  to  $t + 5$ ). An abruptness score larger than 0.5 indicates that  
270 turnover of more than 50 % of community compositions occurred between the time-  
271 windows<sup>19</sup>.

272  
273 **Whole-genome shotgun metagenomics.** Focusing on a replicate microcosm in which the  
274 most rapid and substantial turnover of community compositions was observed (replicate no. 5

275 of Water/Medium-A treatment; Supplementary Fig. 1), whole-genome shotgun metagenomics  
276 was conducted by targeting 13 samples (Day 1, 10, 20, 24, 30, 40, 50, 60, 70, 80, 90, 100,  
277 110). Each DNA sample was processed with Nextera XT DNA Library Preparation Kit  
278 (Illumina) and sequenced with the DNBSEQ-G400 (BGI; 200-bp paired-end sequencing).  
279 From the output data, sequencing adaptors were removed using Cutadapt<sup>43</sup> 2.5 and quality  
280 filtering was performed with Fastp<sup>44</sup> 0.21.0: ca. 10 Gb/sample was subjected to the analysis  
281 [in total, 159.96 Gb (1000.301 M reads)].

282 The sequences of each sample were assembled with metaSPAdes<sup>45</sup> 3.15.2. Binning was  
283 then performed with MetaWRAP<sup>46</sup> 1.3.2, followed by quality assessing with CheckM<sup>47</sup> 1.1.3.  
284 Only the MAGs with > 80 % completeness and < 5 % contamination were used in the  
285 downstream analyses. The identity between MAGs were calculated using FastANI<sup>48</sup> 1.33 and  
286 MAGs with  $\geq 98$  % identity were dereplicated through the time-series (Supplementary Table  
287 1). Read-coverage was then calculated with CoverM<sup>49</sup> 0.6.0, followed by taxonomic  
288 annotation was performed using GTDB-Tk<sup>50,51</sup> 1.6. Gene annotation was performed with  
289 Prokka<sup>26</sup> 1.14.6, yielding 6,999 annotated genes (Supplementary Data 1). To conduct  
290 additional functional annotation of genes, the orthology numbers of Kyoto Encyclopedia of  
291 Genomes (KEGG) were retrieved using GhostKOALA<sup>52</sup> 2.2. For respective microbial MAGs  
292 (bins), completeness of metabolic pathways was estimated with KEGG decoder<sup>53</sup> 1.3. Based  
293 on the matrix representing KEGG metabolic pathway/process profiles of respective MAGs  
294 (Supplementary Data 2), a heatmap showing pathway/process completeness was drawn  
295 (Supplementary Fig. 3).

296

297 **Background environmental conditions.** For the 13 samples subjected to the shotgun  
298 metagenomic analysis, concentrations of ammonium ( $\text{NH}_4^+$ ) and nitrate ( $\text{NO}_3^-$ ) were  
299 measured to obtain supplementary information of background environmental conditions.  
300 Colorimetric methods with a modified indophenol reaction<sup>54,55</sup> and the VCI3/Griess assay  
301 were applied for the measurements of  $\text{NH}_4^+$  and  $\text{NO}_3^-$ , respectively. Samples were run in  
302 triplicates via a standard addition method to account for individual matrix effects<sup>56</sup>.

303

304 **Multivariate analysis of the metagenomic space.** Based on the whole matrix representing  
305 the profiles of the 6,999 genes (Supplementary Data 1), the Jaccard metric of  $\beta$ -diversity was  
306 calculated for each pair of the 32 microbial MAGs ( $\beta_{ij}$ , where  $i$  and  $j$  represent MAGs). The

307  $\beta$ -diversity estimates were then used to perform a principal coordinate analysis. Using the  
308 obtained principal coordinate scores, all the microbial MAGs detected through the time-series  
309 were plotted on a multivariate space consisting of the first three PCoA axes (PCoA 1, PCoA 2,  
310 and PCoA 3). At each time point, the MAGs detected with the shotgun metagenomic  
311 sequencing (defined as the MAGs whose relative abundance is greater than 0.1 %) was  
312 plotted on the three-dimensional space defined with the PCoA axes.

313

314 **Evaluation of niche overlap level.** The community-scale magnitude of potential niche  
315 overlap among species was evaluated based on the whole-genome shogun sequencing dataset.  
316 Specifically, the niche overlap index was defined as:

317 
$$1 - \frac{\sum_{i \in D, j \in D} \beta_{ij}}{N_D},$$

318 where  $D$  is the set of MAGs detected on a focal day (relative abundance > 0.1 %),  $\beta_{ij}$  is the  
319 Jaccard metric of dissimilarity in gene compositions (defined in the previous section), and  $N_D$   
320 is the number of MAGs detected on the day.

321 The scores of the niche overlap index were shown on a two-dimensional space  
322 representing metabolic pathway/process compositions of the whole community at respective  
323 time points. At each time point, the gene repertoires of the detected MAGs (the MAGs whose  
324 relative abundance is greater than 0.1 %) were summed, yielding a matrix representing 13  
325 time points  $\times$  6,999 genes. The matrix was used to calculate dissimilarity (Jaccard  $\beta$ -diversity)  
326 in microbiome-scale gene repertoires among time points to perform a PCoA analysis.

327 To test whether a high level of fundamental-niche overlap is observed prior to drastic  
328 changes in microbial community structure, we examined relationship between the above niche  
329 overlap index and time-series shifts in community structure (Bray-Curtis  $\beta$ -diversity between  
330 present and next time points through the time-series of the shotgun metagenomic data).

331

### 332 **Data availability**

333 The 16S rRNA sequencing data reported in a previous study<sup>19</sup> are available from the DNA  
334 Data Bank of Japan (DDBJ) with the accession number DRA013352, DRA013353,  
335 DRA013354, DRA013355, DRA013356, DRA013368 and DRA013379. The whole-genome

336 shotgun metagenomics data are available with the DDBJ accession number DRA013382. The  
337 microbial community data are deposited at our GitHub repository  
338 ([https://github.com/hiroakif93/MTS\\_nicheSpace](https://github.com/hiroakif93/MTS_nicheSpace)) [to be publicly available after acceptance of  
339 the paper]. The matrices of the shotgun metagenomic data are available as Supplementary  
340 Data 1 and 2.

341

## 342 **Code availability**

343 All the scripts used to analyze the data are available at the GitHub repository  
344 ([https://github.com/hiroakif93/MTS\\_nicheSpace](https://github.com/hiroakif93/MTS_nicheSpace)) [to be publicly available after acceptance of  
345 the paper].

346

347 **Acknowledgements.** Computation time was provided by the SuperComputer System,  
348 Institute for Chemical Research, Kyoto University. This work was financially supported by  
349 JST PRESTO (JPMJPR16Q6), Human Frontier Science Program (RGP0029/2019), JSPS  
350 Grant-in-Aid for Scientific Research (20K20586), NEDO Moonshot Research and  
351 Development Program (JPNP18016), and JST FOREST (JPMJFR2048) to H.T., JSPS Grant-  
352 in-Aid for Scientific Research (20K06820 and 20H03010) to K.S., and JSPS Fellowship to  
353 H.F. and A.C..

354

355 **Author Contributions.** H.T. designed the work with H.F.. H.F. and A.C. performed  
356 experiments. H.F. analyzed the data with Y.O., and H.T.. H.F. and H.T. wrote the paper with  
357 all the authors.

358

359 **Competing Interests.** The authors declare no competing interests.

360

## 361 **Additional information**

362 **Supplementary information** is available for this paper at [URL to be supplied by the  
363 publisher]

364 **Correspondence and requests for materials** should be addressed to [fujita.h@ecology.kyoto-](mailto:fujita.h@ecology.kyoto-)  
365 [u.ac.jp](mailto:u.ac.jp) or [toju.hirokazu.4c@kyoto-u.ac.jp](mailto:toju.hirokazu.4c@kyoto-u.ac.jp).

366

## 367 **References**

- 368 1. Gause, G. F. *The Struggle for Coexistence*. (Williams & Wilkins, 1934).
- 369 2. Hardin, G. The competitive exclusion principle. *Science (1979)* **131**, 1292–1297  
370 (1960).
- 371 3. Volterra, V. Variations and fluctuations of the number of individuals in animal species  
372 living together. *ICES Journal of Marine Science* **3**, 3–51 (1928).
- 373 4. Zaret, T. M. & Rand, A. S. Competition in tropical stream fishes: support for the  
374 competitive exclusion principle. *Ecology* **52**, 336–342 (1971).
- 375 5. Mayfield, M. M. & Levine, J. M. Opposing effects of competitive exclusion on the  
376 phylogenetic structure of communities. *Ecol Lett* **13**, 1085–1093 (2010).
- 377 6. Grime, J. P. Competitive exclusion in herbaceous vegetation. *Nature* **242**, 344–347  
378 (1973).
- 379 7. Letten, A. D., Ke, P. J. & Fukami, T. Linking modern coexistence theory and  
380 contemporary niche theory. *Ecol Monogr* **87**, 161–177 (2017).
- 381 8. Chesson, P. Updates on mechanisms of maintenance of species diversity. *Journal of*  
382 *Ecology* **106**, 1773–1794 (2018).
- 383 9. Chesson, P. Mechanisms of maintenance of species diversity. *Annu Rev Ecol Syst* **31**,  
384 343–366 (2000).
- 385 10. Chase, J. M. & Leibold, M. A. *Ecological niches: linking classical and contemporary*  
386 *approaches*. *Biodiversity and Conservation* (University of Chicago Press, 2004).  
387 doi:10.1023/b:bioc.0000029366.24837.fc.
- 388 11. Hutchinson, G. E. Concluding Remarks. *Cold Spring Harb Symp Quant Biol* **22**, 415–  
389 427 (1957).
- 390 12. Régimbeau, A. *et al.* Contribution of genome-scale metabolic modelling to niche

- 391 theory. *Ecol Lett* **25**, 1352–1364 (2022).
- 392 13. Smith, S. R. *et al.* Evolution and regulation of nitrogen flux through  
393 compartmentalized metabolic networks in a marine diatom. *Nat Commun* **10**, 4552  
394 (2019).
- 395 14. Palomo, A. *et al.* Comparative genomics sheds light on niche differentiation and the  
396 evolutionary history of comammox *Nitrospira*. *ISME Journal* **12**, 1779–1793 (2018).
- 397 15. Alneberg, J. *et al.* Ecosystem-wide metagenomic binning enables prediction of  
398 ecological niches from genomes. *Commun Biol* **3**, 119 (2020).
- 399 16. Fahimipour, A. K. & Gross, T. Mapping the bacterial metabolic niche space. *Nat*  
400 *Commun* **11**, 4887 (2020).
- 401 17. Carding, S., Verbeke, K., Vipond, D. T., Corfe, B. M. & Owen, L. J. Dysbiosis of the  
402 gut microbiota in disease. *Microb Ecol Health Dis* **26**, 26191 (2015).
- 403 18. Ravel, J. *et al.* Daily temporal dynamics of vaginal microbiota before, during and after  
404 episodes of bacterial vaginosis. *Microbiome* **1**, 29 (2013).
- 405 19. Fujita, H. *et al.* Alternative stable states, nonlinear behavior, and predictability of  
406 microbiome dynamics. *bioRxiv* <https://doi.org/10.1101/2022.08.23.505041> (2022).
- 407 20. Lahti, L., Salojärvi, J., Salonen, A., Scheffer, M. & de Vos, W. M. Tipping elements in  
408 the human intestinal ecosystem. *Nat Commun* **5**, 4344 (2014).
- 409 21. David, L. A. *et al.* Diet rapidly and reproducibly alters the human gut microbiome.  
410 *Nature* **505**, 559–563 (2014).
- 411 22. Kho, Z. Y. & Lal, S. K. The human gut microbiome - A potential controller of wellness  
412 and disease. *Front Microbiol* **9**, 1835 (2018).
- 413 23. Kriss, M., Hazleton, K. Z., Nusbacher, N. M., Martin, C. G. & Lozupone, C. A. Low  
414 diversity gut microbiota dysbiosis: drivers, functional implications and recovery. *Curr*  
415 *Opin Microbiol* **44**, 34–40 (2018).
- 416 24. Costello, E. K., Stagaman, K., Dethlefsen, L., Bohannan, B. J. M. & Relman, D. A. The  
417 application of ecological theory toward an understanding of the human microbiome.  
418 *Science (1979)* **336**, 1255–1262 (2012).

- 419 25. Huttenhower, C. *et al.* Structure, function and diversity of the healthy human  
420 microbiome. *Nature* **486**, 207–214 (2012).
- 421 26. Seemann, T. Prokka: Rapid prokaryotic genome annotation. *Bioinformatics* **30**, 2068–  
422 2069 (2014).
- 423 27. MacArthur, R. & Levins, R. The limiting similarity, convergence, and divergence of  
424 coexisting species. *American Naturalist* **101**, 377–385 (1967).
- 425 28. Tropini, C., Earle, K. A., Huang, K. C. & Sonnenburg, J. L. The Gut Microbiome:  
426 Connecting Spatial Organization to Function. *Cell Host Microbe* **21**, 433–442 (2017).
- 427 29. Earle, K. A. *et al.* Quantitative Imaging of Gut Microbiota Spatial Organization. *Cell*  
428 *Host Microbe* **18**, 478–488 (2015).
- 429 30. Jansson, J. K. & Hofmockel, K. S. Soil microbiomes and climate change. *Nat Rev*  
430 *Microbiol* **18**, 35–46 (2020).
- 431 31. Fierer, N. Embracing the unknown: Disentangling the complexities of the soil  
432 microbiome. *Nat Rev Microbiol* **15**, 579–590 (2017).
- 433 32. Trivedi, P., Leach, J. E., Tringe, S. G., Sa, T. & Singh, B. K. Plant–microbiome  
434 interactions: from community assembly to plant health. *Nat Rev Microbiol* **18**, 607–621  
435 (2020).
- 436 33. Venter, J. C. *et al.* Environmental Genome Shotgun Sequencing of the Sargasso Sea.  
437 *Science (1979)* **304**, 66–74 (2004).
- 438 34. Gibson, D. G. *et al.* Creation of a bacterial cell controlled by a chemically synthesized  
439 genome. *Science* **329**, 52–6 (2010).
- 440 35. Maiden, M. C. J. *et al.* MLST revisited: The gene-by-gene approach to bacterial  
441 genomics. *Nat Rev Microbiol* **11**, 728–736 (2013).
- 442 36. Flint, H. J., Scott, K. P., Duncan, S. H., Louis, P. & Forano, E. Microbial degradation of  
443 complex carbohydrates in the gut. *Gut Microbes* **3**, 289–306 (2012).
- 444 37. Nowinski, B. & Moran, M. A. Niche dimensions of a marine bacterium are identified  
445 using invasion studies in coastal seawater. *Nat Microbiol* **6**, 524–532 (2021).
- 446 38. Pereira, F. C. & Berry, D. Microbial nutrient niches in the gut. *Environ Microbiol* **19**,



- 447 1366–1378 (2017).
- 448 39. Heintz-Buschart, A. & Wilmes, P. Human gut microbiome: function matters. *Trends*  
449 *Microbiol* **26**, 563–574 (2018).
- 450 40. Schirmer, M. *et al.* Dynamics of metatranscription in the inflammatory bowel disease  
451 gut microbiome. *Nat Microbiol* **3**, 337–346 (2018).
- 452 41. Turner, T. R. *et al.* Comparative metatranscriptomics reveals kingdom level changes in  
453 the rhizosphere microbiome of plants. *ISME Journal* **7**, 2248–2258 (2013).
- 454 42. Legendre, P. & de Cáceres, M. Beta diversity as the variance of community data:  
455 Dissimilarity coefficients and partitioning. *Ecol Lett* **16**, 951–963 (2013).
- 456 43. Martin, M. Cutadapt removes adapter sequences from high-throughput sequencing  
457 reads. *EMBnet J* **17**, <https://doi.org/10.14806/ej.17.1.200> (2011).
- 458 44. Chen, S., Zhou, Y., Chen, Y. & Gu, J. Fastp: An ultra-fast all-in-one FASTQ  
459 preprocessor. *Bioinformatics* **34**, i884–i890 (2018).
- 460 45. Bankevich, A. *et al.* SPAdes: A new genome assembly algorithm and its applications to  
461 single-cell sequencing. *Journal of Computational Biology* **19**, 455–477 (2012).
- 462 46. Uritskiy, G. v., DiRuggiero, J. & Taylor, J. MetaWRAP—a flexible pipeline for  
463 genome-resolved metagenomic data analysis. *Microbiome* **6**, 158 (2018).
- 464 47. Parks, D. H., Imelfort, M., Skennerton, C. T., Hugenholtz, P. & Tyson, G. W. CheckM:  
465 Assessing the quality of microbial genomes recovered from isolates, single cells, and  
466 metagenomes. *Genome Res* **25**, 1043–1055 (2015).
- 467 48. Jain, C., Rodriguez-R, L. M., Phillippy, A. M., Konstantinidis, K. T. & Aluru, S. High  
468 throughput ANI analysis of 90K prokaryotic genomes reveals clear species boundaries.  
469 *Nat Commun* **9**, 5114 (2018).
- 470 49. Woodcroft B. CoverM: program available at <https://github.com/wwood/CoverM>.  
471 Preprint at (2021).
- 472 50. Chaumeil, P. A., Mussig, A. J., Hugenholtz, P. & Parks, D. H. GTDB-Tk: A toolkit to  
473 classify genomes with the genome taxonomy database. *Bioinformatics* **36**, 1925–1927  
474 (2020).

- 475 51. Parks, D. H. *et al.* GTDB: an ongoing census of bacterial and archaeal diversity  
476 through a phylogenetically consistent, rank normalized and complete genome-based  
477 taxonomy. *Nucleic Acids Res* **50**, D785–D794 (2022).
- 478 52. Kanehisa, M., Sato, Y. & Morishima, K. BlastKOALA and GhostKOALA: KEGG  
479 Tools for Functional Characterization of Genome and Metagenome Sequences. *J Mol*  
480 *Biol* **428**, 726–731 (2016).
- 481 53. Graham, E. D., Heidelberg, J. F. & Tully, B. J. Potential for primary productivity in a  
482 globally-distributed bacterial phototroph. *ISME Journal* **12**, 1861–1866 (2018).
- 483 54. Kandeler, E. & Gerber, H. Short-term assay of soil urease activity using colorimetric  
484 determination of ammonium. *Biol Fertil Soils* **6**, 68–72 (1988).
- 485 55. Hood-Nowotny, R., Umana, N. H.-N., Inselbacher, E., Oswald- Lachouani, P. &  
486 Wanek, W. Alternative methods for measuring inorganic, organic, and total dissolved  
487 nitrogen in soil. *Soil Science Society of America Journal* **74**, 1018–1027 (2010).
- 488 56. Taylor, B. W. *et al.* Improving the fluorometric ammonium method: Matrix effects,  
489 background fluorescence, and standard additions. *J North Am Benthol Soc* **26**, 167–177  
490 (2007).
- 491

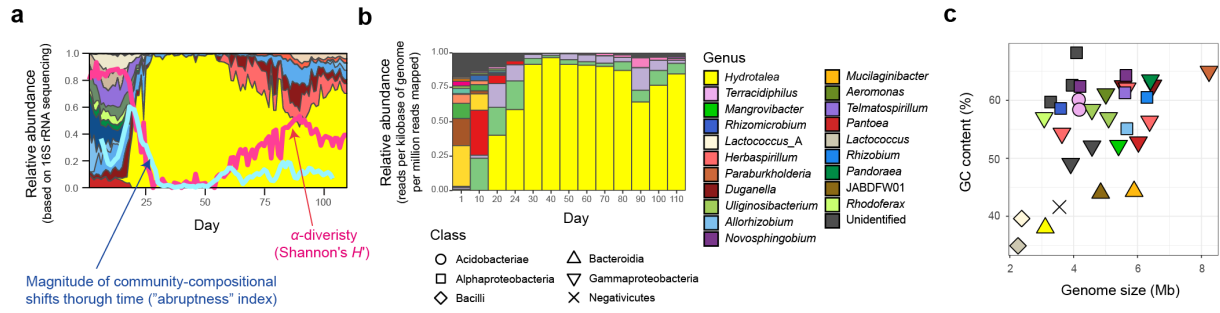

492

493 **Fig. 1 | Community and ecosystem dynamics. a**, Time-series data of community structure.  
 494 For the replicate microcosm that showed the most abrupt community compositional changes  
 495 through the 110-day microbiome experiment<sup>19</sup> (Supplementary Fig. 1), family-level  
 496 taxonomic compositions inferred with 16S rRNA sequencing are shown. The blue line  
 497 represents the speed and magnitude of community compositional changes around each time  
 498 point ("abruptness" index<sup>19</sup>; see Methods). The red line indicates  $\alpha$ -diversity (Shannon's  $H'$ )  
 499 of microbial ASVs<sup>19</sup>. Note that a value larger than 0.5 represents turnover of more than 50 %  
 500 of microbial ASV compositions. See Supplementary Figure 1 for color profiles of bacterial  
 501 families. Reproduced from the data of a previous study<sup>19</sup>. **b**, Taxonomic compositions inferred  
 502 with whole-genome shotgun sequencing. At each of the 13 time points through the time-series  
 503 of the target microcosm, the relative abundance of each MAG was estimated based on the  
 504 normalized read coverage value (reads per kilobase of genome per million reads mapped). **c**,  
 505 Genome size and GC nucleotide content of the MAGs detected in the target microcosm. See  
 506 panel **b** for colors and symbols.

507

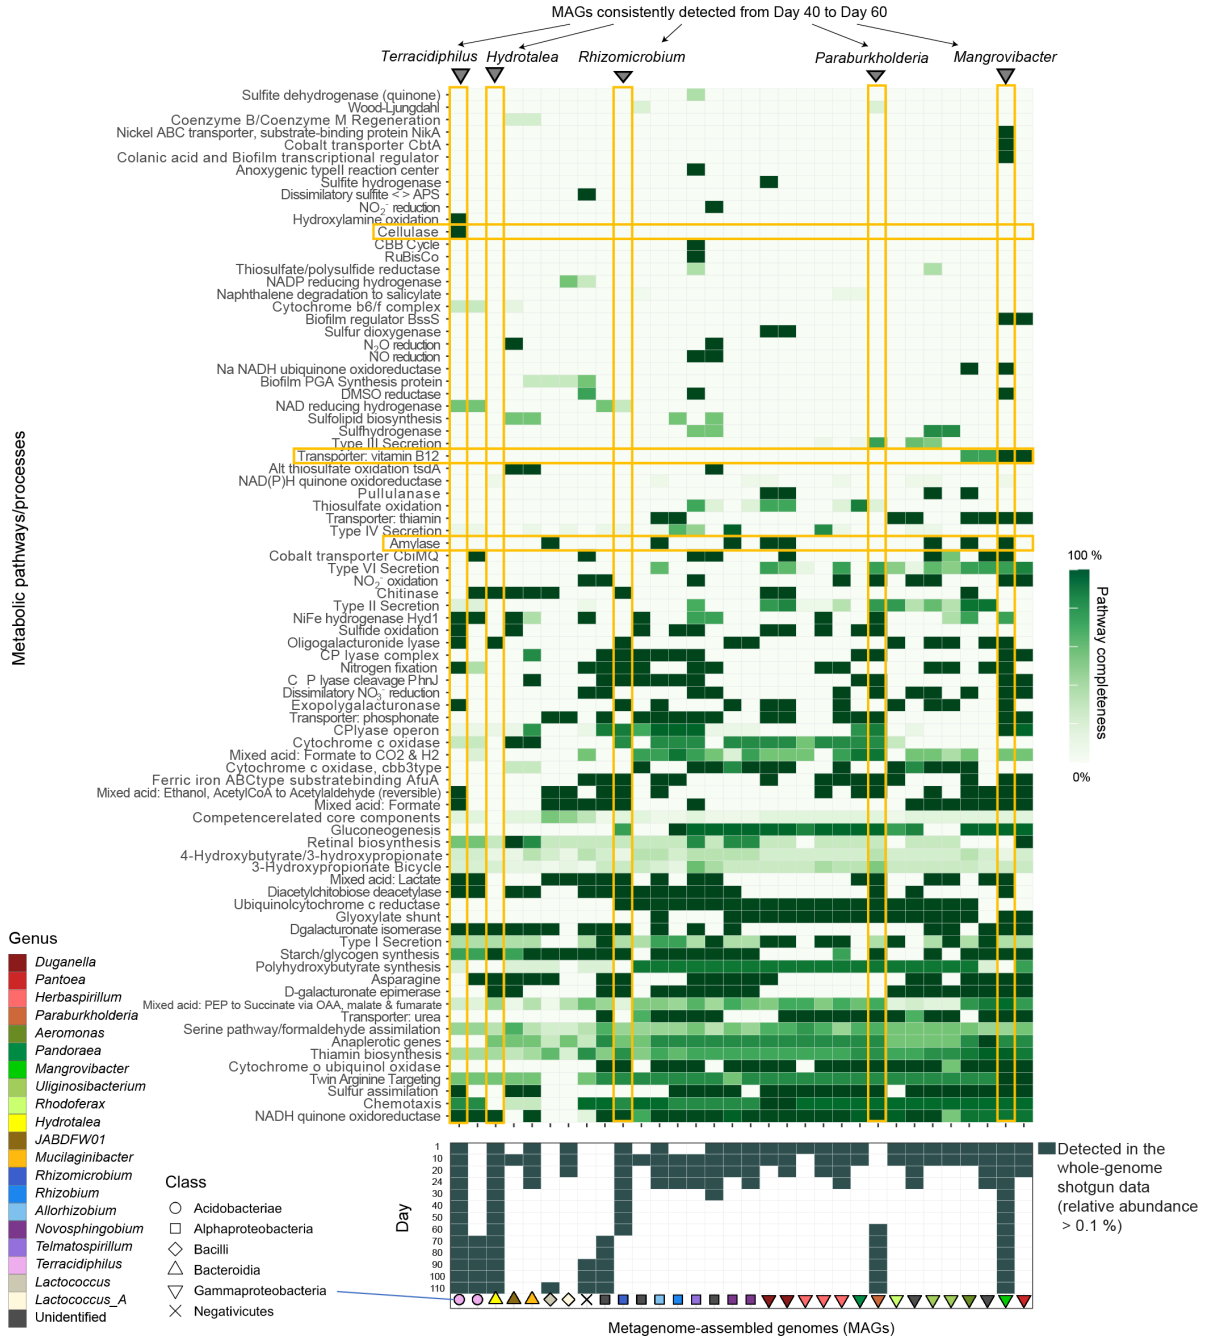

508

509 **Fig. 2 | Metabolic pathway/process profiles of the MAGs.** KEGG metabolic  
 510 pathways/profiles of the reconstructed bacterial genomes (MAGs) are shown. The detection  
 511 (relative abundance > 0.1 %) of each microbial MAG on each day within the whole-genome  
 512 shotgun data is indicated in the panel below. Only the microbial MAGs with > 80 %  
 513 completeness and < 5 % contamination were included (Supplementary Table 1). The five  
 514 MAGs that co-occurred from Day 40 to 60 and metabolic pathways/processes mentioned in  
 515 the main text are highlighted. Only the metabolic pathways/processes with highly  
 516 heterogeneous patterns across microbial MAGs are shown. See Supplementary Figure 3 for

517 detailed profiles of the metabolic pathways/processes.

518

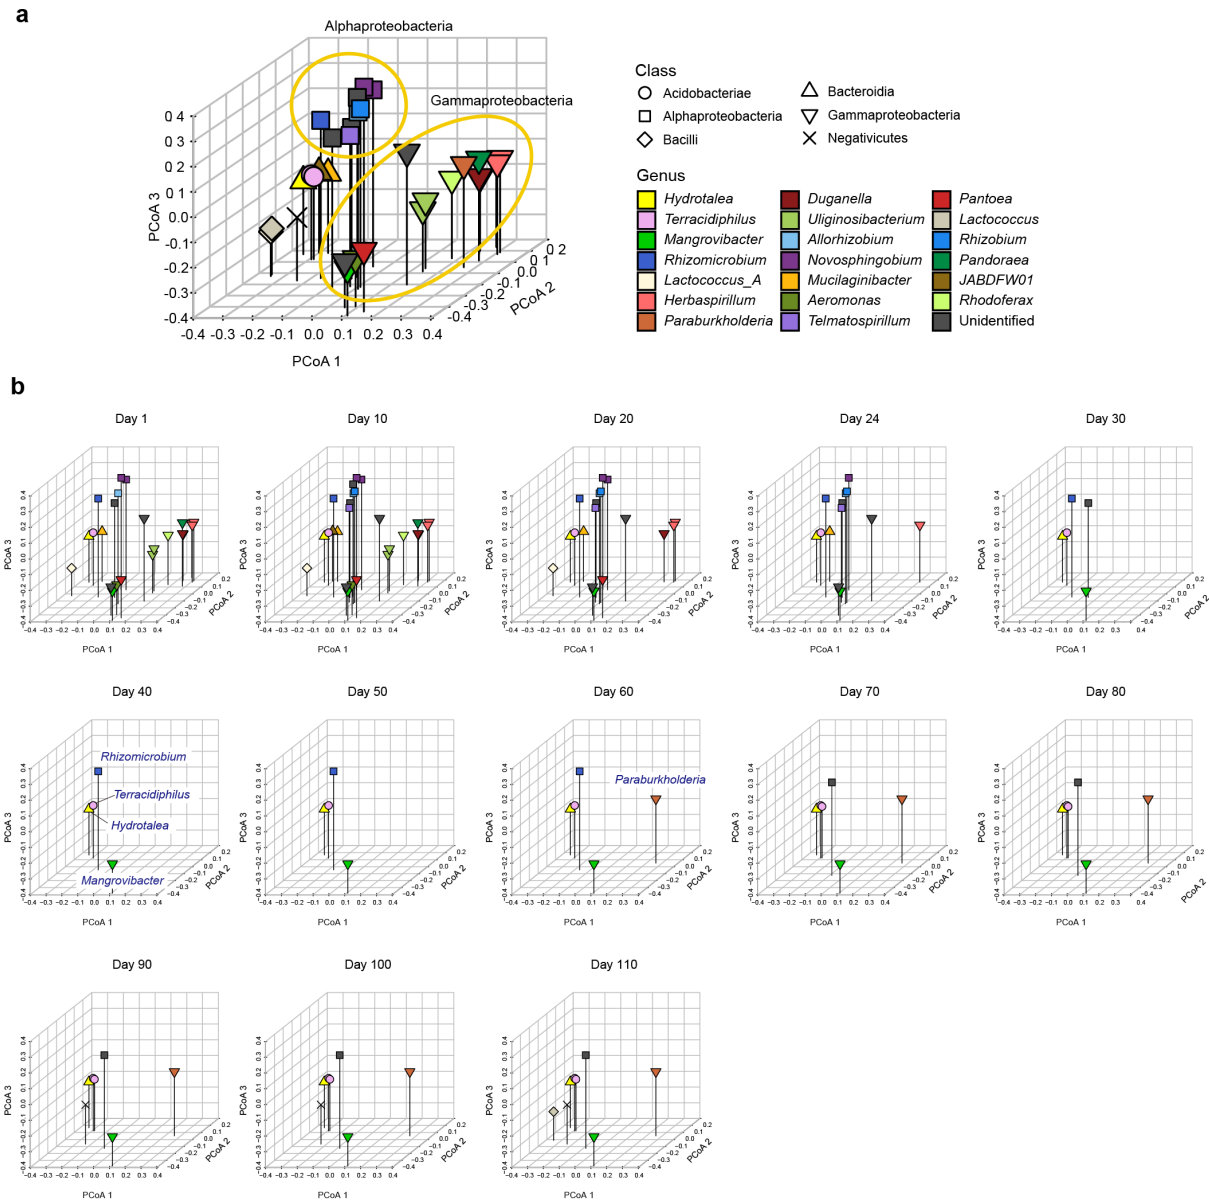

520 **Fig. 3 | Metagenomic niche space. a**, Distributions of MAGs within metagenomic niche  
 521 space. Based on dissimilarity in gene repertoires, microbial MAGs that appeared in the time-  
 522 series of the target microcosm were plotted on the three-dimensional space defined by the  
 523 principal coordinate analysis (PCoA) of 6,999 genes. **b**, Changes in the distributions of  
 524 microbial MAGs within niche space. At each time point, detected MAGs (relative abundance  
 525 > 0.1 %) were plotted on the space defined in the multivariate analysis in the in the panel **a**.  
 526

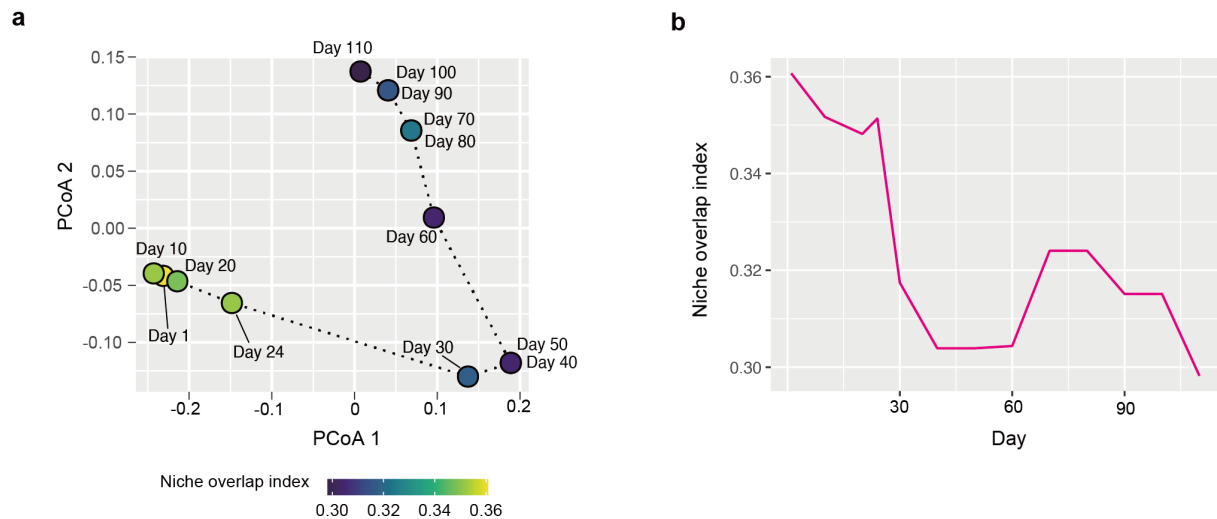

527

528 **Fig. 4 | Dynamics of niche-overlap level. a**, Community-level profiles of metabolic  
529 pathways/processes and niche overlap index. The niche overlap index was defined as  $1 - \bar{\beta}$ ,  
530 where  $\bar{\beta}$  was mean Jaccard dissimilarity ( $\beta$ -diversity) of gene compositions between pairs of  
531 the microbial MAGs detected at a target time point. The scores of the niche overlap index  
532 were shown on a PCoA surface representing community-level compositions of genes. On the  
533 PCoA surface, time points are distributed based on the sum of the gene repertoires of the  
534 detected MAGs. **b**, Dynamics of niche-overlap levels. Niche overlap scores are shown across  
535 the time-series.

536

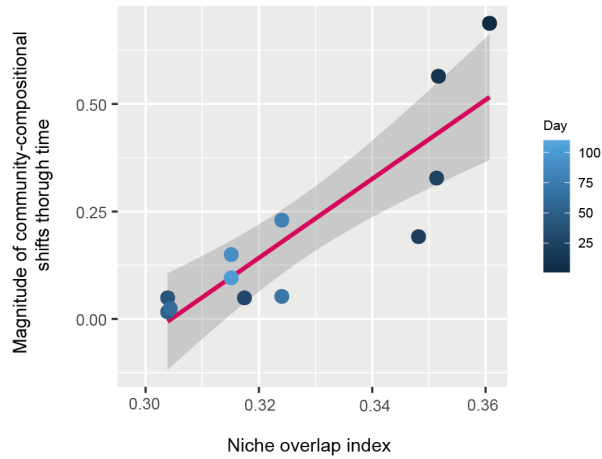

537

538 **Fig. 5 | Niche overlap level and community compositional shifts.** The magnitude of  
539 community compositional changes observed in the microbiome was regressed on niche  
540 overlap index obtained based on the whole-genome shotgun analysis. Niche overlap index at  
541 each time point and time-series shifts in community structure (Bray-Curtis  $\beta$ -diversity  
542 between present and next time points through the time-series of the shotgun metagenomic  
543 data) are shown along horizontal and vertical axes, respectively. The regression line is shown  
544 with 95 % confidence intervals.

545



## 546 **Supplementary Figure Captions**

547

548 **Supplementary Fig. 1 | Dynamics of family-level community structure.** The dynamics of  
549 microbial family-level compositions were visualized based on the 16S rRNA sequencing data  
550 of the previous study<sup>19</sup>. The replicate microcosm (replicate no. 5 in Water/Medium-A  
551 treatment), which is subjected to the whole-genome shotgun sequencing analysis, is  
552 highlighted. The blue line represents the speed and magnitude of community compositional  
553 changes around each time point (“abruptness” index<sup>19</sup>; see Methods). The red line indicates  
554  $\alpha$ -diversity (Shannon’s  $H'$ ) of microbial ASVs<sup>19</sup>. Reproduced from the data of a previous  
555 study<sup>19</sup>.

556

557 **Supplementary Fig. 2 | Overview of the whole-genome shotgun sequencing data. a,**  
558 Comparison of relative abundance of bacterial taxa (families) between 16S rRNA amplicon  
559 sequencing<sup>19</sup> (reproduced from the previous study<sup>19</sup>; top) and whole-genome shotgun  
560 sequencing (this study; bottom). **b,** Correlation between the family-level relative abundance  
561 of 16S rRNA and whole-genome shotgun sequencing data (Spearman’s correlation;  $\rho = 0.667$ ,  
562  $df = 794$ ,  $P < 0.05$ ). Each point represents each family at each time point. **c,** Background  
563 chemical properties. Changes in  $\text{NO}_3^-$  and  $\text{NH}_4^+$  concentrations in the ecosystem are shown  
564 for the time points with whole-genome shotgun metagenomic data.

565

566 **Supplementary Fig. 3 | Detailed information of the metabolic pathway/process profiles**  
567 **of the MAGs.** The KEGG metabolic pathways/processes of the reconstructed bacterial  
568 genomes (MAGs) are shown. The detection (relative abundance  $> 0.1\%$ ) of each microbial  
569 MAG on each day within the whole-genome shotgun data is indicated in the panel below.  
570 Only the microbial MAGs with  $> 80\%$  completeness and  $< 5\%$  contamination were included  
571 (Supplementary Table 1). The five MAGs that co-occurred from Day 40 to 60 and metabolic  
572 pathways/profiles mentioned in the main text are highlighted. The detailed definition of the  
573 KEGG metabolic pathways/processes is available at  
574 [https://github.com/bjtully/BioData/blob/master/KEGGDecoder/KOALA\\_definitions.txt](https://github.com/bjtully/BioData/blob/master/KEGGDecoder/KOALA_definitions.txt).

575
