# Supplementary material for: Metagenomic analysis of ecological niche overlap and community collapse in microbiome dynamics
Source: bioRxiv or medRxiv preprint supplement (doi:10.1101/2023.01.17.524457), 2023-04-30

**a**

## 16S rRNA amplicon sequencing

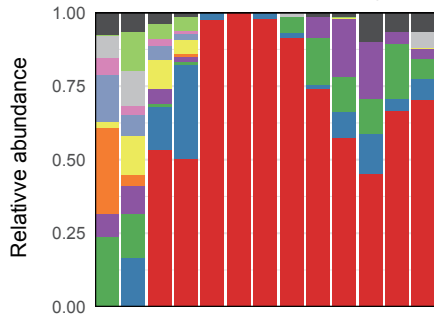

## Whole-genome shotgun sequencing

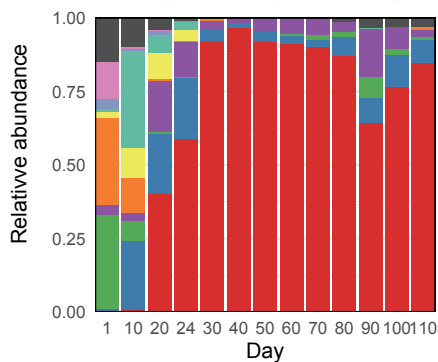

## Family

- Chitinophagaceae
- Acidobacteriaceae
- Burkholderiaceae
- Enterobacteriaceae
- Streptococcaceae
- Magnetospirillaceae
- Micropepsaceae
- Sphingomonadaceae
- Chromobacteriaceae
- UBA1301
- Unidentified
- Others

**b**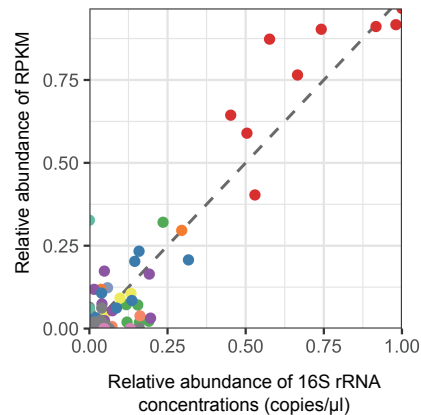**c**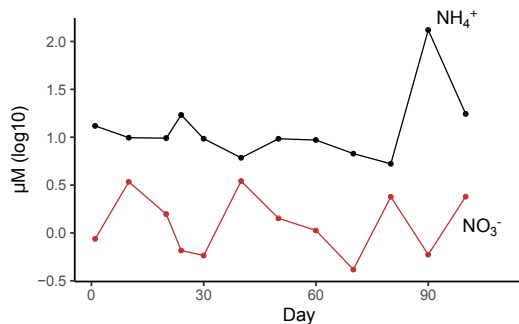

Supplement: Supplementary file [file media-2.pdf]
